# Supplementary material
Source: PubMed Central journal article supplement (PMC4468737)
Supplement: AAC.00526-15_zac007154139so1.pdf [file AAC.00526-15_zac007154139so1.pdf]

**Figure S1. *C. difficile* proteins of interest.**

**(A) Cdi2979 Cls**

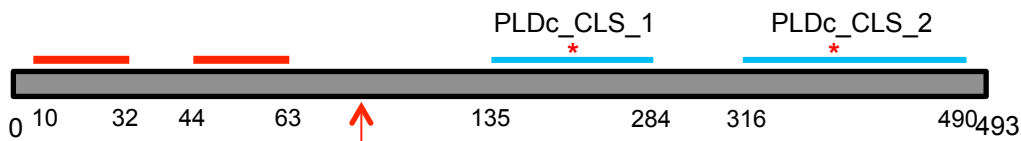

**(B) Cdi2989 FabK**

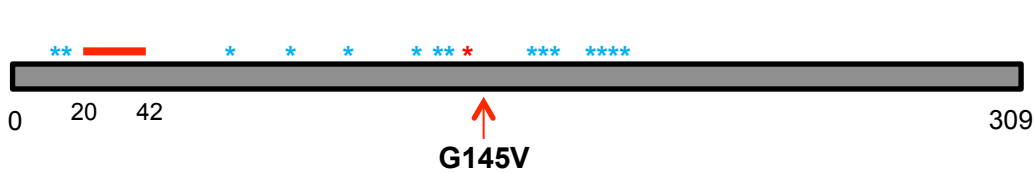

**(C) Cdi2989 FtsH2**

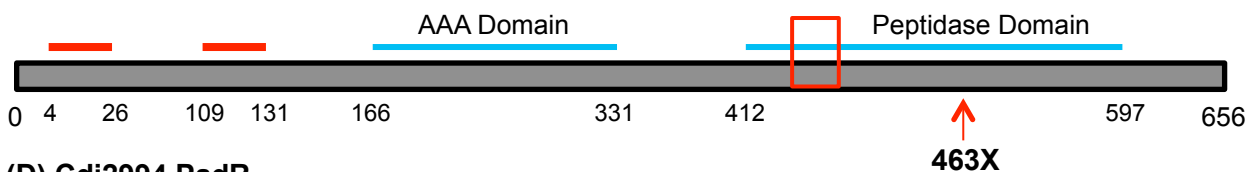

**(D) Cdi2994 PadR**

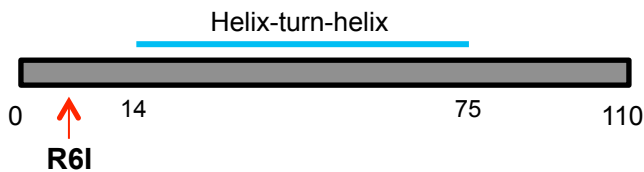

**Figure S1. *C. difficile* proteins of interest.** Proteins of interest in the *C. difficile* strains Cdi2979, Cid2989, and Cdi2994 are depicted. NCBI Conserved Domain analysis identified putative catalytic sites (red asterisks) and putative co-factor binding sites (blue asterisks). Conserved protein domains of interest are shown. Transmembrane regions were predicted using TMHMM v2.0 and are shown as red bars above the protein. Amino acid substitutions occurring in pass strains are indicated by red arrows. (A) Cls. Red asterisks indicate putative catalytic residues at positions 228 and 411. (B) FabK. Blue asterisks represent FMN binding sites at residues 18, 19, 70, 94, 115, 136, 140-141, 167-169, and 188-191. A single catalytic site was indicated at residue 143. (C) FtsH2. The HEXXH catalytic site is indicated by a red box. (D) SurR.

**Figure S2. *E. faecalis* 807 proteins of interest.**

**(A) Efs807 MprF2**

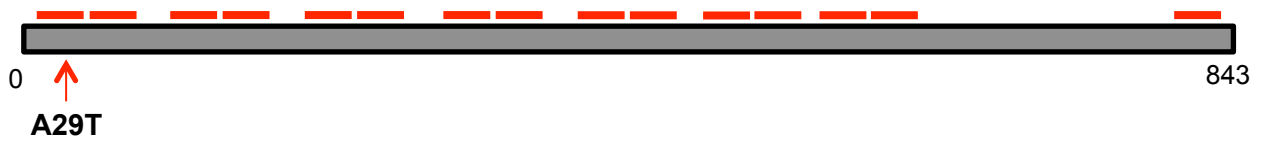

**(B) Efs807 DrmA**

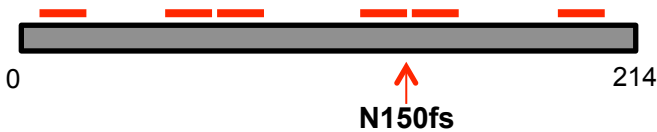

**(C) Efs807 EF0797**

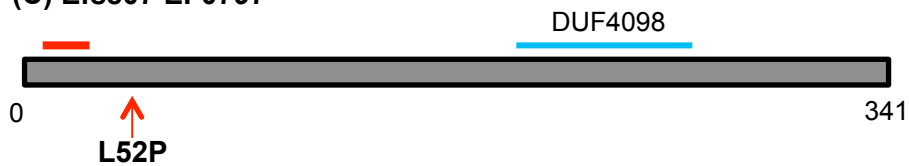

**Figure S2. Efs807 (V583) proteins of interest.** The three V583 proteins from Table 2 are depicted. Conserved domains were identified using Pfam v27.0 and NCBI Conserved domains. TMHMM v2.0 was used to predict transmembrane helices and are represented by red bars above the protein. Amino acid substitutions occurring in pass strains are indicated by red arrows. (A) MprF2. Transmembrane helices occur at amino acid positions 13-35; 50-72; 93-115; 130-152; 165-182; 202-224; 236-258; 273-295; 324-346; 361-383; 390-407; 412-426; 447-466; 486-505; 818-837. (B) DrmA. Transmembrane helices occur at amino acid positions 7-26; 54-76; 83-105; 125-147; 154-176; 186-205. (C) EF0797. Transmembrane helix occurs from amino acids 5-27. DUF, domain of unknown function.

**Figure S3. *E. faecalis* 201 proteins of interest.**

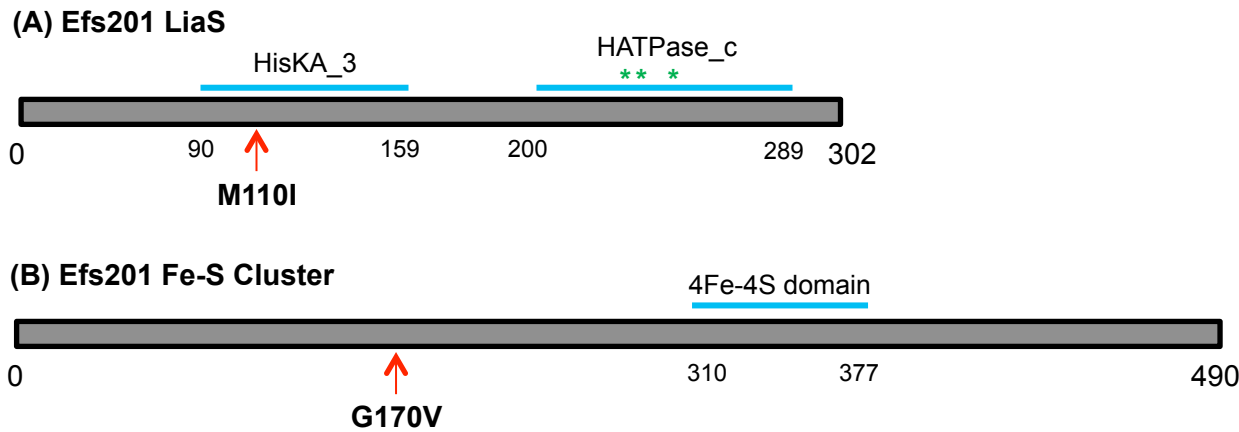

**Figure S3. *E. faecalis* 201 proteins of interest.** NCBI Conserved Domain analysis was used to identify conserved protein domains (represented as blue bars) and putative catalytic sites and important residues. Amino acid changes occurring in pass strains are indicated by red arrows. (A) LiaS. Green asterisks represent the G-X-G motif of the HATPase\_c domain on residues 239, 241, and 255. (B) Fe-S cluster protein.

**Figure S4. *E. faecium* 14 proteins of interest.**

**(A) HD hydrolase**

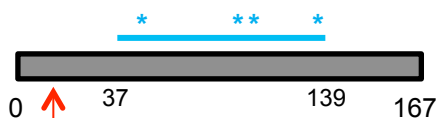

**E10fs**

**(B) Aminopeptidase**

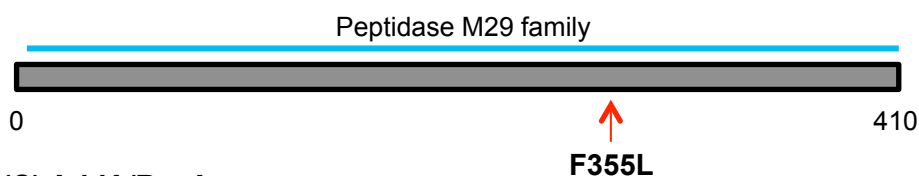

**(C) AddA/RexA**

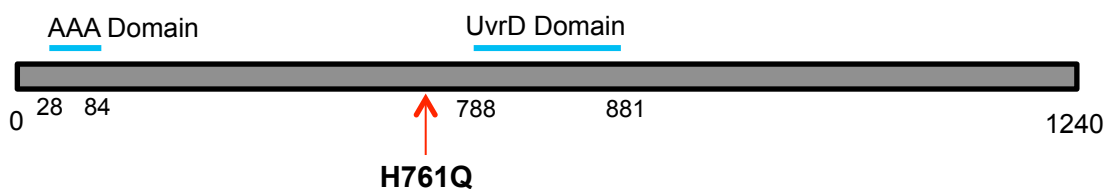

**Figure S4. *E. faecium* 14 proteins of interest.** NCBI Conserved Domain analysis identified putative co-factor binding sites. Conserved domains are indicated by blue bars above the protein. Amino acid changes occurring in pass strains are indicated by red arrows. (A) HD family hydrolase. Blue asterisks represent  $\text{Zn}^{2+}$  binding sites at residues 41, 70, 71, and 137. (B) Aminopeptidase PepS. (C) AddA/RexA.

**Figure S5. *E. faecium* 277 proteins of interest.**

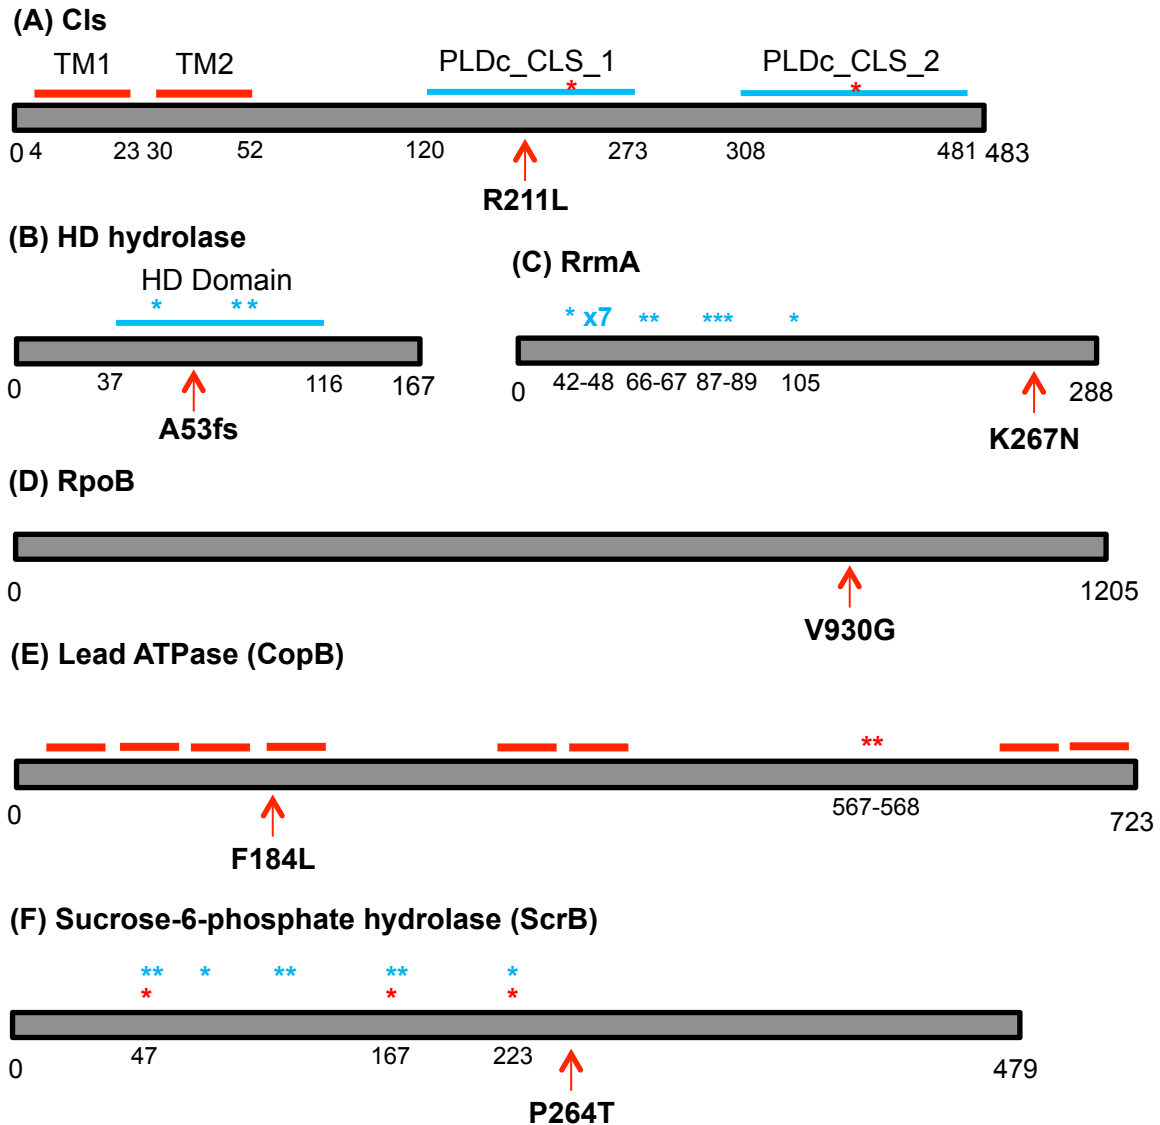

**Figure S5. *E. faecium* 277 proteins of interest.** NCBI Conserved Domain analysis identified conserved domains as well as putative catalytic residues and co-factor/substrate binding sites. TMHMM v2.0 was used to predict transmembrane domains, which are depicted as red bars above the protein. Amino acid changes occurring in pass strains are indicated by red arrows. (A) Cls. Red asterisks indicate putative catalytic sites (residues 217 and 401). (B) HD family hydrolase. Blue asterisks represent  $\text{Zn}^{2+}$  binding sites at residues 41, 70, and 71. (C) RrmA. Blue asterisks represent S-adenosyl-methionine binding sites. The x7 indicates seven binding sites in close proximity. (D) RpoB. Many protein interaction sites surround the V930G substitution; the interaction sites are centered roughly around residues 830 and 990. The interaction sites, while not depicted, may be affected by the substitution. (E) Lead ATPase CopB. Red asterisks indicate putative catalytic residues. Transmembrane helices occur at residues 83-102; 117-136; 148-170; 180-197; 332-354; 364-386; 672-694; 698-720. (F) Sucrose-6-phosphate hydrolase ScrB. Red asterisks represent putative catalytic residues (positions indicated on figure), while blue asterisks represent substrate binding sites at residues 46, 47, 63, 106, 107, 166, 167, and 223.

1 **Table S1. *De novo* parent genome assemblies using CLC Genomics Workbench.**

2

| Strain name          | # reads<br>(151 bases/read) | # contigs | Min<br>contig<br>size (bp) | Max contig<br>size (bp) | Average<br>contig size | Contig N <sub>50</sub><br>(bp) | # genes<br>annotated<br>by RAST | Genome<br>size |
|----------------------|-----------------------------|-----------|----------------------------|-------------------------|------------------------|--------------------------------|---------------------------------|----------------|
| Cdi2179 <sup>b</sup> | 17,786,604                  | 861       | 128                        | 263,413                 | 5,211                  | 94,116                         | 4192                            | 4.49 Mb        |
| Cdi2989 <sup>b</sup> | 16,000,099                  | 702       | 121                        | 236,376                 | 6,206                  | 76,852                         | 4004                            | 4.36 Mb        |
| Cdi2994 <sup>a</sup> | 16,169,705                  | 379       | 148                        | 271,320                 | 11,593                 | 97,218                         | 4144                            | 4.39 Mb        |
| Efs201 <sup>b</sup>  | 18,575,124                  | 603       | 123                        | 140,203                 | 5,054                  | 40,197                         | 2915                            | 3.05 Mb        |
| Efm14 <sup>b</sup>   | 18,354,871                  | 493       | 127                        | 170,021                 | 5,946                  | 57,717                         | 3058                            | 2.93 Mb        |
| Efm277 <sup>b</sup>  | 21,077,510                  | 926       | 112                        | 148,413                 | 3,457                  | 36,818                         | 3281                            | 3.20 Mb        |

3

4 <sup>a</sup>R1 reads were used.

5 <sup>b</sup>R2 reads were used.

6

**Table S2. Efs807 reads aligned to Genbank V583 reference sequences.**

| Strain        | Total reads <sup>a</sup> | Chr. <sup>b</sup> | Chr. coverage <sup>c</sup> | pTEF1 <sup>b</sup> | pTEF1 coverage <sup>c</sup> | pTEF2 <sup>b</sup> | pTEF2 coverage <sup>c</sup> | pTEF3 <sup>b</sup> | pTEF3 coverage <sup>c</sup> | Non-assembled |
|---------------|--------------------------|-------------------|----------------------------|--------------------|-----------------------------|--------------------|-----------------------------|--------------------|-----------------------------|---------------|
| <b>Parent</b> | 17,244,147               | 16,208,107        | 44-2018<br>(716)           | 308,424            | 84-1621<br>(655)            | 172,904            | 29-1063<br>(422)            | 115,165            | 136-1679<br>(900)           | 439,682       |
| <b>Pass</b>   | 19,135,853               | 17,836,074        | 0-2431<br>(783)            | 321,309            | 69-1798<br>(673)            | 176,634            | 28-1153<br>(426)            | 105,861            | 111-1522<br>(813)           | 696,103       |

<sup>a</sup>Total single end reads generated by Illumina sequencing, after demultiplexing. Each read is 151 nucleotides long.

<sup>b</sup>Number of reads aligned to reference sequence (chromosome, pTEF1, pTEF2, or pTEF3). Chr, chromosome.

<sup>c</sup>Range of fold coverage is shown; average fold coverage is in parentheses.

**Table S3. Primers used.**

| Primer name                         | Sequence               |
|-------------------------------------|------------------------|
| <b><u>Clostridium difficile</u></b> |                        |
| Cdi2179 Cls For                     | GGAGGGAATTTTATGTTTGATA |
| Cdi2179 Cls Rev                     | GTCTATTATTTTCAGTTCCGA  |
| Cdi2989 FtsH2 For                   | GCTACATACTCTAATCTATCCA |
| Cdi2989 FtsH2 Rev                   | TACCATGAAGGAGGGCATGC   |
| Cdi2989 FabK For                    | CCTACTTGAAGTGCAGTGGC   |
| Cdi2989 FabK Rev                    | ATAGCAGCAGGAAACGCACC   |
| Cdi2994 PadR For                    | GCAGGACCTTCATTAGATTC   |
| Cdi2994 PadR Rev                    | GCAGAACATAGTACTGTGTT   |
| <b><u>Enterococci</u></b>           |                        |
| Efm14 HD Hydrolase For              | GCGAGCAGATAACTATAGTA   |
| Efm14 HD Hydrolase Rev              | GCAGAACATAGTACTGTGTT   |
| Efm14 $\alpha\beta$ Hydrolase For   | GGCCAGAGCGCAAAGACTA    |
| Efm14 $\alpha\beta$ Hydrolase Rev   | GCCGAACAAGGCGAAGATG    |
| Efm14 Aminopeptidase For            | GCTCAAGCCCAATCTCCA     |
| Efm14 Aminopeptidase Rev            | GCCGAACAAGGCGAAGATG    |
| Efm14 Hypothetical For              | CCTCAAGAAGTTCGTGCAC    |
| Efm14 Hypothetical Rev              | CCTCGAACCAGTCAGTTTTTC  |
| Efm14 ATP Nuclease For              | CGGGATATCTAGAGTATGTG   |
| Efm14 ATP Nuclease Rev              | CCCGTGTTTCAGGATCCAT    |
| Efm277 Ribosomal MTase For          | CGGTGTCAGTCACTGCGA     |
| Efm277 Ribosomal MTase Rev          | CGTGTAGTAGCCAAGTTTG    |
| Efm277 RNAPol Subunit $\beta$ For   | CTCGTGAAGCTGGAGATGA    |
| Efm277 RNAPol Subunit $\beta$ Rev   | CGCATCGCTGGCCATACC     |
| Efm277 Metal Transporter For        | CCATCTTTCGTCAAGCGTT    |
| Efm277 Metal Transporter Rev        | GGCTCGTATTGATCTTAGCA   |
| Efm277 Cls For                      | CGGCCAGCAAGTCTTACAT    |
| Efm277 Cls Rev                      | GCGGCACCGAAAATCCGTA    |
| Efm277 HD Hydrolase For             | GGCGTGAAGACGAAGAATA    |
| Efm277 HD Hydrolase Rev             | CCGACAAATCGGTGATCTTT   |
| Efm277 Putative For                 | GGCCTGATTCTCTTGGCGC    |
| Efm277 Putative Rev                 | CCAATCCAGCTCCTCGATT    |

|                              |                        |
|------------------------------|------------------------|
| Efm277 Sucrose Hydrolase For | CGCATACGCTTCAAATCCAT   |
| Efm277 Sucrose Hydrolase Rev | GCGATTGTTGGAGCACAA     |
| Efs201 Lia For               | CCGATCGGATTTCAAGACGC   |
| Efs201 Lia Rev               | CGTTTTCTGCTTCGCCTACG   |
| Efs201 YkgF For              | AACCGTGCCCTCCAATATGG   |
| Efs201 YkgF Rev              | TGGGAGAAACGAGAAGGTGC   |
| Efs807 EF0797 For            | GTACGAGTGGTATTGATGGTT  |
| Efs807 EF0797 Rev            | CAACAGGGATTCTCTTATCCA  |
| Efs807 MprF2 For             | CCGATAACCATCATCAATAACA |
| Efs807 MprF2 Rev             | CGATTGCTGATGCCATTCCT   |
| Efs807 DrmA For              | CAGTGCCAGCATTGGTAGAT   |
| Efs807 DrmA Rev              | CTCTTCAGCGTAGACACTTC   |
| Efs807 EF1367 IG For         | GCTGTGCCACGAATGATTTC   |
| Efs807 EF1367 IG Rev         | CCTCAAGCAACTAACGTTACT  |

---
